# Supplementary material
Source: PubMed Central journal article supplement (PMC4459734)
Supplement: NIHMS495229-supplement-Supplement.pdf [file NIHMS495229-supplement-Supplement.pdf]

**ADVANCED  
HEALTHCARE  
MATERIALS**

Supporting Information

for *Adv. Healthcare Mater.*, DOI: 10.1002/adhm. 201200378

Surface-Micromachined Microfiltration Membranes for  
Efficient Isolation and Functional Immunophenotyping of  
Subpopulations of Immune Cells

*Weiqiang Chen, Nien-Tsu Huang, Boram Oh, Raymond H. W.  
Lam, Rong Fan, Timothy T. Cornell, Thomas P. Shanley,  
Katsuo Kurabayashi,\* and Jianping Fu\**

## Supporting Materials

### Supporting Figures

#### Supporting Figure S1

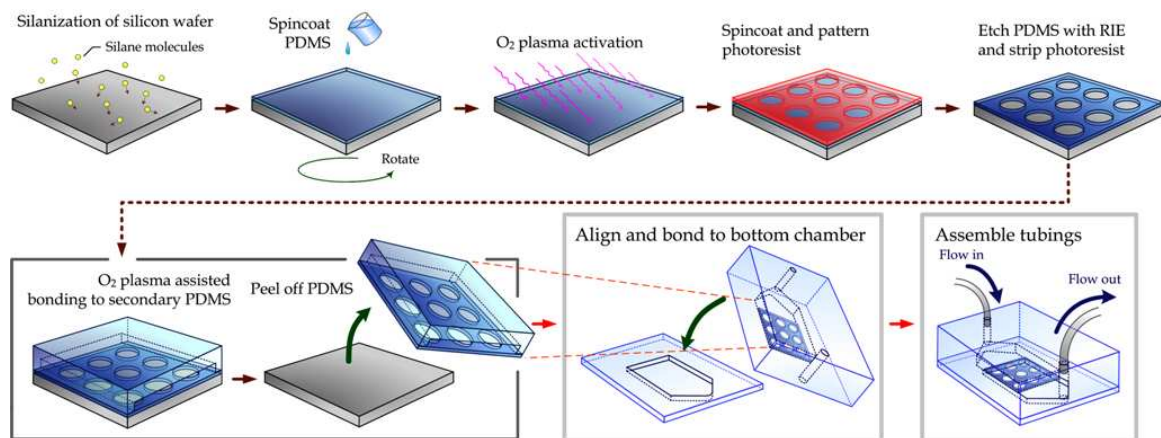

**Figure S1.** Schematic of fabrication process of the PMM-integrated microfiltration device.

## Supporting Figure S2

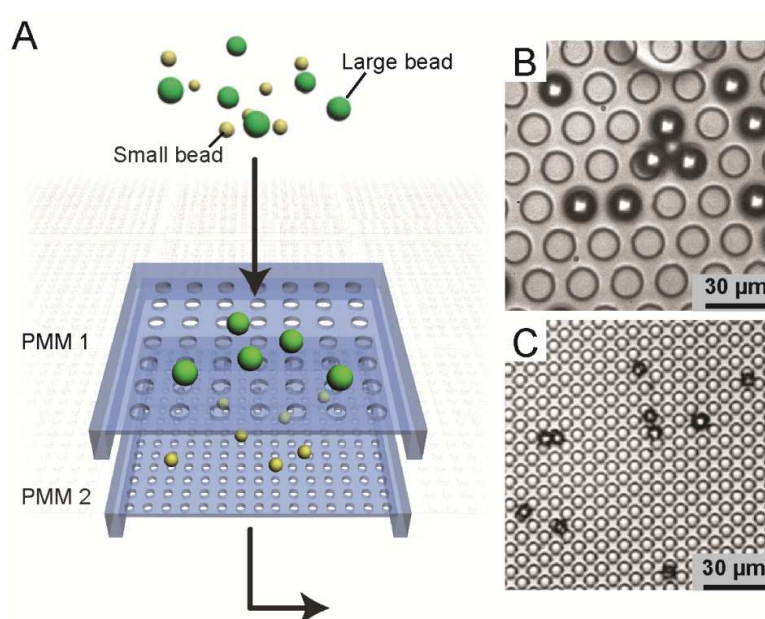

**Figure S2.** Multi-layered PMM-integrated microfiltration device for simultaneous isolations of different sized microbeads. (A) Schematic of the multi-layered PMM-integrated microfiltration device. (B&C) Brightfield images showing 15 μm microbeads captured on the top PMM layer (B) and 6 μm microbeads captured on the bottom PMM layer (C). The top PMM layer had through holes with a diameter of 13 μm, while the bottom PMM layer had through holes with a diameter of 5 μm.

### Supporting Figure S3

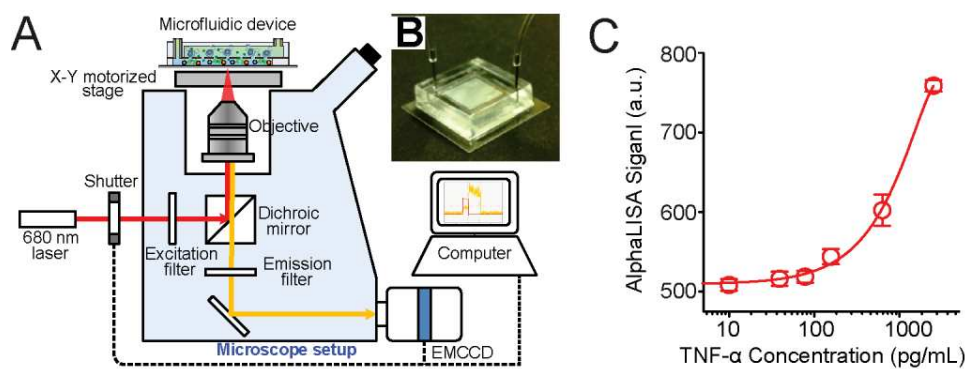

**Figure S3.** (A) Schematic of a custom optical setup for the on-chip AlphaLISA signal detection using the PMM-integrated microfiltration device. (B) Standard curve for TNF- $\alpha$  detection using AlphaLISA. To generate the standard curve, cell growth media spiked with known concentrations of TNF- $\alpha$  (0-5,000 pg/mL) was assayed using AlphaLISA.
